# Supplementary material for: Pyrrolizidine Alkaloids in the Food Chain: Is Horizontal Transfer of Natural Products of Relevance?
Source: MDPI journal article supplement (doi:10.3390/foods10081827), 2021-08-07
Supplement: s1 [file s1]

## **Supplement:**

### **Pyrrolizidine Alkaloids in the Food Chain: Is Horizontal Transfer of Natural Products of Relevance?**

Mohammad Said Chmit<sup>a</sup>, Gerd Horn<sup>b</sup>, Arne Dübecke<sup>c</sup>, Till Beuerle<sup>a,\*</sup>

<sup>a</sup> Technical University of Braunschweig, Institute of Pharmaceutical Biology,  
Mendelssohnstr. 1, 38106 Braunschweig, Germany.

<sup>b</sup> Exsemine GmbH, Am Wehr 4, 06198 Salzatal, Germany.

<sup>c</sup> Quality Services International GmbH, Flughafendamm 9a, 28199 Bremen, Germany.

\* Corresponding author

## Contents

- Set-up of compost bins p. 3
- Analysis results of soil nutrients by ÖHMI (Magdeburg, Germany); Control-compost 2018, *Senecio*-compost 2018, *Senecio/Lappula*-compost 2018, *Lappula*-compost 2018, *Lappula squarrosa*-press cake, Control-compost 2019, *Senecio*-compost 2019, *Senecio/Lappula*-compost 2019, and *Lappula*-compost 2019 respectively. pp. 4-12
- Calculated amounts of compost/press-cakes added to each plot to meet the nutrient requirements p. 13
- Parameters of HPLC-ESI-MS/MS sum parameter analysis p. 14
- Summarized analytical results comprising 31 individual PAs and PANOs conducted by QSI (#45183) p. 15
- Picture to illustrate Investigations of distance-related effects on PA-transfer p. 16

# Composition of individual composts

## Control-compost

The control- compost was build up according to the following ratios: 88% compost stock, 9.5% compost starter and 2.5% bio starter.

## Senecio-compost

*S. jacobaea*-compost contains the following components: 56% compost stock, 9.5% compost starter, 2.5% bio starter and 32% *S. jacobaea* material.

## Senecio/Lappula-compost

To build up *S. jacobaea* - and *L. squarrosa*- Compost the following components were used:

64% compost stock, 9.5% compost starter, 2.5% bio starter, 15% *S. jacobaea* material and 9% *L. squarrosa* press cake powder.

## Lappula-compost

*L. squarrosa*-compost was created from: 74% compost stock, 9.5% compost starter, 2.5% bio starter and 14% *L. squarrosa* press cake powder.

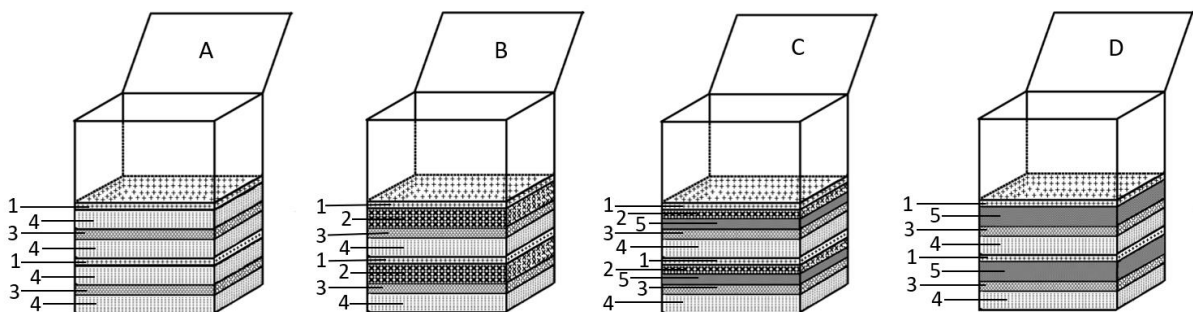

**Fig. S1.** Setting up of compost-bins; A: Control- Compost, B: *S. jacobaea*- Compost, C: *S. jacobaea* and *L. squarrosa*-Compost, D: *L. squarrosa*- Compost. 1- compost starter, 2- *S. jacobaea* material, 3- bio starter, 4- compost stock, 5- *L. squarrosa* press cake.

# Prüfbericht

Magdeburg,  
09.10.2018

Prüfbericht-Nr.:  
A 18.2632

**Auftraggeber:** EXSEMIN GmbH  
Am Wehr 4  
06198 Salzatal OT Zappendorf

**Email:** g.horn@exsemine.de

**Auftragnehmer/  
Ort der Labortätigkeit:** ÖHMI Analytik GmbH  
Berliner Chaussee 66  
39114 Magdeburg

**Probenahme:** erfolgte durch Auftraggeber

**Eingangsparameter:** 02.10.2018 / 14:40 Uhr / 15,5 °C

**Lagerung vor Untersuchung:** Kühlagerung bei max. 5,0 °C

**Untersuchungsbeginn:** 02.10.2018 / 14:55 Uhr

**Untersuchungsende:** 09.10.2018

**Probenbezeichnung:** Laut Kundeninformation:  
Kompost 1C  
= A 18.2632

|                              |           |                                        |             |
|------------------------------|-----------|----------------------------------------|-------------|
| Kunden-Proben-Nr.:           |           |                                        | Kompost 1C  |
| ÖHMI-Proben-Nr.: A 18.2632/1 |           |                                        |             |
| Kennzahl                     | Dimension | Methode                                | A 18.2632/1 |
|                              |           |                                        |             |
| Trocken-rückstand            | %         | DIN EN 12880<br>Stand: 02-2001         | 48,7        |
| Gesamt-N                     | % OS      | Methodenbuch<br>VDLUFA +<br>Berechnung | 0,54        |
|                              |           |                                        |             |
| CAL-Extrakt                  | kg/t OS   | Methodenbuch<br>VDLUFA                 |             |
| P                            | kg/t OS   | DIN EN ISO 11885<br>Stand:09-2009      | 0,69        |
| K                            | kg/t OS   | DIN EN ISO 11885<br>Stand: 09-2009     | 1,04        |
|                              |           |                                        |             |
| CaCl <sub>2</sub> -Extrakt   |           |                                        |             |
| Ammonium-N                   | kg/t OS   | E DIN ISO 14256<br>Stand:03-2003       | 0,0054      |
|                              |           |                                        |             |

OS = Originalsubstanz

Bianca Denecke  
Abteilungsleiterin Chemie

Die Prüfergebnisse beziehen sich ausschließlich auf das untersuchte Prüfmaterial. Sollte die Probenahme nicht durch die ÖHMI Analytik GmbH erfolgt sein, beziehen sich die Ergebnisse auf die Probe wie erhalten. Ohne schriftliche Genehmigung des Prüflaboratoriums darf der Prüfbericht nicht auszugsweise vervielfältigt oder veröffentlicht werden. Es gelten unsere Allgemeinen Geschäftsbedingungen. Mit Auftragserteilung gelten die Allgemeinen Geschäftsbedingungen als anerkannt.

Seite 1 von 1

# Prüfbericht

Magdeburg,  
09.10.2018

Prüfbericht-Nr.:  
A 18.2633

**Auftraggeber:** EXSEMIN GmbH  
Am Wehr 4  
06198 Salzatal OT Zappendorf

**Email:** g.horn@exsemine.de

**Auftragnehmer/  
Ort der Labortätigkeit:** ÖHMI Analytik GmbH  
Berliner Chaussee 66  
39114 Magdeburg

**Probenahme:** erfolgte durch Auftraggeber

**Eingangsparameter:** 02.10.2018 / 14:40 Uhr / 15,5 °C

**Lagerung vor Untersuchung:** Kühlagerung bei max. 5,0 °C

**Untersuchungsbeginn:** 02.10.2018 / 14:55 Uhr

**Untersuchungsende:** 09.10.2018

**Probenbezeichnung:** Laut Kundeninformation:  
Kompost 2S  
= A 18.2633

|                              |           |                                        |             |
|------------------------------|-----------|----------------------------------------|-------------|
| Kunden-Proben-Nr.:           |           |                                        | Kompost 2 S |
| ÖHMI-Proben-Nr.: A 18.2633/1 |           |                                        |             |
| Kennzahl                     | Dimension | Methode                                | A 18.2633/1 |
|                              |           |                                        |             |
| Trocken-<br>rückstand        | %         | DIN EN 12880<br>Stand: 02-2001         | 49,4        |
| Gesamt-N                     | % OS      | Methodenbuch<br>VDLUFA +<br>Berechnung | 0,68        |
|                              |           |                                        |             |
| CAL-Extrakt                  | kg/t OS   | Methodenbuch<br>VDLUFA                 |             |
| P                            | kg/t OS   | DIN EN ISO 11885<br>Stand:09-2009      | 1,21        |
| K                            | kg/t OS   | DIN EN ISO 11885<br>Stand: 09-2009     | 2,15        |
|                              |           |                                        |             |
| CaCl <sub>2</sub> -Extrakt   |           |                                        |             |
| Ammonium-N                   | kg/t OS   | E DIN ISO 14256<br>Stand:03-2003       | 0,015       |
|                              |           |                                        |             |

OS = Originalsubstanz

Bianca Denecke  
Abteilungsleiterin Chemie

Die Prüfergebnisse beziehen sich ausschließlich auf das untersuchte Prüfmaterial. Sollte die Probenahme nicht durch die ÖHMI Analytik GmbH erfolgt sein, beziehen sich die Ergebnisse auf die Probe wie erhalten. Ohne schriftliche Genehmigung des Prüflaboratoriums darf der Prüfbericht nicht auszugsweise vervielfältigt oder veröffentlicht werden. Es gelten unsere Allgemeinen Geschäftsbedingungen. Mit Auftragserteilung gelten die Allgemeinen Geschäftsbedingungen als anerkannt.

Seite 1 von 1

# Prüfbericht

Magdeburg,  
09.10.2018

Prüfbericht-Nr.:  
A 18.2634

**Auftraggeber:** EXSEMIN GmbH  
Am Wehr 4  
06198 Salztal OT Zappendorf

**Email:** g.horn@exsemine.de

**Auftragnehmer/  
Ort der Labortätigkeit:** ÖHMI Analytik GmbH  
Berliner Chaussee 66  
39114 Magdeburg

**Probenahme:** erfolgte durch Auftraggeber

**Eingangsparameter:** 02.10.2018 / 14:40 Uhr / 15,5 °C

**Lagerung vor Untersuchung:** Kühlung bei max. 5,0 °C

**Untersuchungsbeginn:** 02.10.2018 / 14:55 Uhr

**Untersuchungsende:** 09.10.2018

**Probenbezeichnung:** Laut Kundeninformation:  
Kompost 3 SL  
= A 18.2634

|                              |           |                                        |              |
|------------------------------|-----------|----------------------------------------|--------------|
| Kunden-Proben-Nr.:           |           |                                        | Kompost 3 SL |
| ÖHMI-Proben-Nr.: A 18.2634/1 |           |                                        |              |
| Kennzahl                     | Dimension | Methode                                | A 18.2634/1  |
|                              |           |                                        |              |
| Trocken-rückstand            | %         | DIN EN 12880<br>Stand: 02-2001         | 46,1         |
| Gesamt-N                     | % OS      | Methodenbuch<br>VDLUFA +<br>Berechnung | 0,66         |
|                              |           |                                        |              |
| CAL-Extrakt                  | kg/t OS   | Methodenbuch<br>VDLUFA                 |              |
| P                            | kg/t OS   | DIN EN ISO 11885<br>Stand:09-2009      | 1,58         |
| K                            | kg/t OS   | DIN EN ISO 11885<br>Stand: 09-2009     | 1,87         |
|                              |           |                                        |              |
| CaCl <sub>2</sub> -Extrakt   |           |                                        |              |
| Ammonium-N                   | kg/t OS   | E DIN ISO 14256<br>Stand:03-2003       | 0,013        |
|                              |           |                                        |              |

OS = Originalsubstanz

Bianca Denecke  
Abteilungsleiterin Chemie

Die Prüfergebnisse beziehen sich ausschließlich auf das untersuchte Prüfmaterial. Sollte die Probenahme nicht durch die ÖHMI Analytik GmbH erfolgt sein, beziehen sich die Ergebnisse auf die Probe wie erhalten. Ohne schriftliche Genehmigung des Prüflaboratoriums darf der Prüfbericht nicht auszugsweise vervielfältigt oder veröffentlicht werden. Es gelten unsere Allgemeinen Geschäftsbedingungen. Mit Auftragserteilung gelten die Allgemeinen Geschäftsbedingungen als anerkannt.

Seite 1 von 1

# Prüfbericht

Magdeburg,  
09.10.2018

Prüfbericht-Nr.:  
A 18.2635

**Auftraggeber:** EXSEMIN GmbH  
Am Wehr 4  
06198 Salzatal OT Zappendorf

**Email:** g.horn@exsemine.de

**Auftragnehmer/  
Ort der Labortätigkeit:** ÖHMI Analytik GmbH  
Berliner Chaussee 66  
39114 Magdeburg

**Probenahme:** erfolgte durch Auftraggeber

**Eingangsparameter:** 02.10.2018 / 14:40 Uhr / 15,5 °C

**Lagerung vor Untersuchung:** Kühlagerung bei max. 5,0 °C

**Untersuchungsbeginn:** 02.10.2018 / 14:55 Uhr

**Untersuchungsende:** 09.10.2018

**Probenbezeichnung:** Laut Kundeninformation:  
Kompost 4 L  
= A 18.2635

|                              |           |                                        |             |
|------------------------------|-----------|----------------------------------------|-------------|
| Kunden-Proben-Nr.:           |           |                                        | Kompost 4 L |
| ÖHMI-Proben-Nr.: A 18.2635/1 |           |                                        |             |
| Kennzahl                     | Dimension | Methode                                | A 18.2635/1 |
|                              |           |                                        |             |
| Trocken-rückstand            | %         | DIN EN 12880<br>Stand: 02-2001         | 47,2        |
| Gesamt-N                     | % OS      | Methodenbuch<br>VDLUFA +<br>Berechnung | 0,69        |
|                              |           |                                        |             |
| CAL-Extrakt                  | kg/t OS   | Methodenbuch<br>VDLUFA                 |             |
| P                            | kg/t OS   | DIN EN ISO 11885<br>Stand:09-2009      | 1,78        |
| K                            | kg/t OS   | DIN EN ISO 11885<br>Stand: 09-2009     | 2,15        |
|                              |           |                                        |             |
| CaCl <sub>2</sub> -Extrakt   |           |                                        |             |
| Ammonium-N                   | kg/t OS   | E DIN ISO 14256<br>Stand:03-2003       | 0,10        |
|                              |           |                                        |             |

OS = Originalsubstanz

Bianca Denecke  
Abteilungsleiterin Chemie

Die Prüfergebnisse beziehen sich ausschließlich auf das untersuchte Prüfmaterial. Sollte die Probenahme nicht durch die ÖHMI Analytik GmbH erfolgt sein, beziehen sich die Ergebnisse auf die Probe wie erhalten. Ohne schriftliche Genehmigung des Prüflaboratoriums darf der Prüfbericht nicht auszugsweise vervielfältigt oder veröffentlicht werden. Es gelten unsere Allgemeinen Geschäftsbedingungen. Mit Auftragserteilung gelten die Allgemeinen Geschäftsbedingungen als anerkannt.

Seite 1 von 1

# Prüfbericht

Magdeburg,  
09.10.2018

Prüfbericht-Nr.:  
A 18.2636

**Auftraggeber:** EXSEMIN GmbH  
Am Wehr 4  
06198 Salzatal OT Zappendorf

**Email:** g.horn@exsemine.de

**Auftragnehmer/  
Ort der Labortätigkeit:** ÖHMI Analytik GmbH  
Berliner Chaussee 66  
39114 Magdeburg

**Probenahme:** erfolgte durch Auftraggeber

**Eingangsparameter:** 02.10.2018 / 14:40 Uhr / 15,5 °C

**Lagerung vor Untersuchung:** Kühlagerung bei max. 5,0 °C

**Untersuchungsbeginn:** 02.10.2018 / 14:55 Uhr

**Untersuchungsende:** 09.10.2018

**Probenbezeichnung:** Presskuchen Lappula squarrosa Press 6-7/16,  
gemahlen 18.4.18  
= A 18.2636

|                              |           |                                        |                                                                    |
|------------------------------|-----------|----------------------------------------|--------------------------------------------------------------------|
| Kunden-Proben-Nr.:           |           |                                        | Presskuchen Lappula squarrosa<br>Press 6-7/16,<br>gemahlen 18.4.18 |
| ÖHMI-Proben-Nr.: A 18.2636/1 |           |                                        |                                                                    |
| Kennzahl                     | Dimension | Methode                                | A 18.2636/1                                                        |
|                              |           |                                        |                                                                    |
| Trocken-<br>rückstand        | %         | DIN EN 12880<br>Stand: 02-2001         | 88,4                                                               |
| Gesamt-N                     | % OS      | Methodenbuch<br>VDLUFA +<br>Berechnung | 3,0                                                                |
|                              |           |                                        |                                                                    |
| CAL-Extrakt                  | kg/t OS   | Methodenbuch<br>VDLUFA                 |                                                                    |
| P                            | kg/t OS   | DIN EN ISO 11885<br>Stand:09-2009      | 8,27                                                               |
| K                            | kg/t OS   | DIN EN ISO 11885<br>Stand: 09-2009     | 2,83                                                               |
|                              |           |                                        |                                                                    |
| CaCl <sub>2</sub> -Extrakt   |           |                                        |                                                                    |
| Ammonium-N                   | kg/t OS   | E DIN ISO 14256<br>Stand:03-2003       | < 0,001                                                            |
|                              |           |                                        |                                                                    |

OS = Originalsubstanz

Bianca Denecke  
Abteilungsleiterin Chemie

Die Prüfergebnisse beziehen sich ausschließlich auf das untersuchte Prüfmaterial. Sollte die Probenahme nicht durch die ÖHMI Analytik GmbH erfolgt sein, beziehen sich die Ergebnisse auf die Probe wie erhalten. Ohne schriftliche Genehmigung des Prüflaboratoriums darf der Prüfbericht nicht auszugsweise vervielfältigt oder veröffentlicht werden. Es gelten unsere Allgemeinen Geschäftsbedingungen. Mit Auftragserteilung gelten die Allgemeinen Geschäftsbedingungen als anerkannt.

Seite 1 von 1



## Prüfbericht

Magdeburg,  
16.10.2019

Prüfbericht-Nr.:  
A 19.2881

**Auftraggeber:** EXSEMIN GmbH  
Am Wehr 4  
06198 Salztal OT Zappendorf  
  
Email: g.horn@exsemine.de

**Auftragnehmer /  
Ort der Labortätigkeit:** ÖHMI Analytik GmbH  
Berliner Chaussee 66  
39114 Magdeburg

**Probenahme:** erfolgte durch Auftraggeber

**Eingangsparameter:** 14.10.2019 / 13:30 Uhr / 16,4 °C

**Lagerung vor Untersuchung:** Kühllagerung bei max. 5,0 °C

**Untersuchungsbeginn:** 14.10.2019 / 13:45 Uhr

**Untersuchungsende:** 16.10.2019

**Probenbezeichnung:** lt. Kundeninformation:  
Kompost 1C  
Kontrolle ohne PAs  
= A19.2881

|                            |           |                                    |                                  |
|----------------------------|-----------|------------------------------------|----------------------------------|
| Kunden-Proben-Nr.:         |           |                                    | Kompost 1C<br>Kontrolle ohne PAs |
| ÖHMI-Proben-Nr.:           |           |                                    |                                  |
| Kennzahl                   | Dimension | Methode                            | A19.2881                         |
|                            |           |                                    |                                  |
| Trocken-<br>rückstand      | %         | DIN EN 12880<br>Stand: 02-2001     | 59,4                             |
| Gesamt-Stickstoff          | % OS      | Methodenbuch VDLUFA                | 0,62                             |
| CAL-Extrakt                |           | Methodenbuch VDLUFA                |                                  |
| Phosphor                   | kg/t OS   | DIN EN ISO 11885<br>Stand: 09-2009 | 0,718                            |
| Kalium                     | kg/t OS   | DIN EN ISO 11885<br>Stand: 09-2009 | 0,494                            |
| CaCl <sub>2</sub> -Extrakt |           | Methodenbuch VDLUFA                |                                  |
| Ammonium-<br>Stickstoff    | kg/t OS   | E DIN ISO 14256<br>Stand: 03-2003  | 0,0013                           |
|                            |           |                                    |                                  |

OS = Originalsubstanz

  
Bianca Dercke  
Abteilungsleiterin Chemie

Die Prüfergebnisse beziehen sich ausschließlich auf das untersuchte Prüfmaterial. Sollte die Probenahme nicht durch die ÖHMI Analytik GmbH erfolgt sein, beziehen sich die Ergebnisse auf die Probe wie erhalten. Ohne schriftliche Genehmigung des Prüflaboratoriums darf der Prüfbericht nicht auszugsweise vervielfältigt oder veröffentlicht werden. Es gelten unsere Allgemeinen Geschäftsbedingungen. Mit Auftragserteilung gelten die Allgemeinen Geschäftsbedingungen als anerkannt.

## Prüfbericht

Magdeburg,  
16.10.2019

Prüfbericht-Nr.:  
A 19.2882

**Auftraggeber:** EXSEMIN GmbH  
Am Wehr 4  
06198 Salztal OT Zappendorf  
  
Email: g.horn@exsemine.de

**Auftragnehmer /  
Ort der Labortätigkeit:** ÖHMI Analytik GmbH  
Berliner Chaussee 66  
39114 Magdeburg

**Probenahme:** erfolgte durch Auftraggeber

**Eingangsparameter:** 14.10.2019 / 13:30 Uhr / 16,4 °C

**Lagerung vor Untersuchung:** Kühllagerung bei max. 5,0 °C

**Untersuchungsbeginn:** 14.10.2019 / 13:45 Uhr

**Untersuchungsende:** 16.10.2019

**Probenbezeichnung:** lt. Kundeninformation:  
Kompost 2S  
Senecio Kompost  
= A19.2882

|                            |           |                                    |                               |
|----------------------------|-----------|------------------------------------|-------------------------------|
| Kunden-Proben-Nr.:         |           |                                    | Kompost 2S<br>Senecio Kompost |
| ÖHMI-Proben-Nr.:           |           |                                    |                               |
| Kennzahl                   | Dimension | Methode                            | A19.2882                      |
|                            |           |                                    |                               |
| Trocken-<br>rückstand      | %         | DIN EN 12880<br>Stand: 02-2001     | 53,7                          |
| Gesamt-Stickstoff          | % OS      | Methodenbuch VDLUFA                | 0,66                          |
| CAL-Extrakt                |           | Methodenbuch VDLUFA                |                               |
| Phosphor                   | kg/t OS   | DIN EN ISO 11885<br>Stand: 09-2009 | 0,847                         |
| Kalium                     | kg/t OS   | DIN EN ISO 11885<br>Stand: 09-2009 | 0,787                         |
| CaCl <sub>2</sub> -Extrakt |           | Methodenbuch VDLUFA                |                               |
| Ammonium-<br>Stickstoff    | kg/t OS   | E DIN ISO 14256<br>Stand: 03-2003  | 0,0014                        |
|                            |           |                                    |                               |

OS = Originalsubstanz

  
Bianca Denicke  
Abteilungsleiterin Chemie

Die Prüfergebnisse beziehen sich ausschließlich auf das untersuchte Prüfmaterial. Sollte die Probenahme nicht durch die ÖHMI Analytik GmbH erfolgt sein, beziehen sich die Ergebnisse auf die Probe wie erhalten. Ohne schriftliche Genehmigung des Prüflaboratoriums darf der Prüfbericht nicht auszugsweise vervielfältigt oder veröffentlicht werden. Es gelten unsere Allgemeinen Geschäftsbedingungen. Mit Auftragserteilung gelten die Allgemeinen Geschäftsbedingungen als anerkannt.

## Prüfbericht

Magdeburg,  
16.10.2019

Prüfbericht-Nr.:  
A 19.2883

**Auftraggeber:** EXSEMIN GmbH  
Am Wehr 4  
06198 Salzatal OT Zappendorf  
  
Email: g.horn@exsemine.de

**Auftragnehmer /  
Ort der Labortätigkeit:** ÖHMI Analytik GmbH  
Berliner Chaussee 66  
39114 Magdeburg

**Probenahme:** erfolgte durch Auftraggeber

**Eingangsparameter:** 14.10.2019 / 13:30 Uhr / 16,4 °C

**Lagerung vor Untersuchung:** Kühllagerung bei max. 5,0 °C

**Untersuchungsbeginn:** 14.10.2019 / 13:45 Uhr

**Untersuchungsende:** 16.10.2019

**Probenbezeichnung:** lt. Kundeninformation:  
Kompost 3SL  
Senecio und L.squarrosa  
= A19.2883

|                            |           |                                    |                                        |
|----------------------------|-----------|------------------------------------|----------------------------------------|
| Kunden-Proben-Nr.:         |           |                                    | Kompost 3SL<br>Senecio und L.squarrosa |
| ÖHMI-Proben-Nr.:           |           |                                    |                                        |
| Kennzahl                   | Dimension | Methode                            | A19.2883                               |
|                            |           |                                    |                                        |
| Trocken-<br>rückstand      | %         | DIN EN 12880<br>Stand: 02-2001     | 54,9                                   |
| Gesamt-Stickstoff          | % OS      | Methodenbuch VDLUFA                | 0,70                                   |
| CAL-Extrakt                |           | Methodenbuch VDLUFA                |                                        |
| Phosphor                   | kg/t OS   | DIN EN ISO 11885<br>Stand: 09-2009 | 1,07                                   |
| Kalium                     | kg/t OS   | DIN EN ISO 11885<br>Stand: 09-2009 | 0,908                                  |
| CaCl <sub>2</sub> -Extrakt |           | Methodenbuch VDLUFA                |                                        |
| Ammonium-<br>Stickstoff    | kg/t OS   | E DIN ISO 14256<br>Stand: 03-2003  | 0,0015                                 |
|                            |           |                                    |                                        |

OS = Originalsubstanz

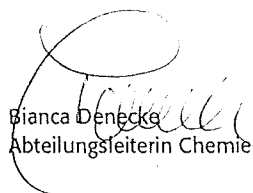  
Bianca Denecke  
Abteilungsleiterin Chemie

Die Prüfergebnisse beziehen sich ausschließlich auf das untersuchte Prüfmaterial. Sollte die Probenahme nicht durch die ÖHMI Analytik GmbH erfolgt sein, beziehen sich die Ergebnisse auf die Probe wie erhalten. Ohne schriftliche Genehmigung des Prüflaboratoriums darf der Prüfbericht nicht auszugsweise vervielfältigt oder veröffentlicht werden. Es gelten unsere Allgemeinen Geschäftsbedingungen. Mit Auftragserteilung gelten die Allgemeinen Geschäftsbedingungen als anerkannt.

## Prüfbericht

Magdeburg,  
16.10.2019

Prüfbericht-Nr.:  
A 19.2884

**Auftraggeber:** EXEMINE GmbH  
Am Wehr 4  
06198 Salzatal OT Zappendorf  
  
Email: g.horn@exemine.de

**Auftragnehmer /  
Ort der Labortätigkeit:** ÖHMI Analytik GmbH  
Berliner Chaussee 66  
39114 Magdeburg

**Probenahme:** erfolgte durch Auftraggeber

**Eingangsparameter:** 14.10.2019 / 13:30 Uhr / 16,4 °C

**Lagerung vor Untersuchung:** Kühlagerung bei max. 5,0 °C

**Untersuchungsbeginn:** 14.10.2019 / 13:45 Uhr

**Untersuchungsende:** 16.10.2019

**Probenbezeichnung:** lt. Kundeninformation:  
Kompost 4L  
Lapulla squarrosa  
= A19.2884

|                            |           |                                    |                                 |
|----------------------------|-----------|------------------------------------|---------------------------------|
| Kunden-Proben-Nr.:         |           |                                    | Kompost 4L<br>Lapulla squarrosa |
| ÖHMI-Proben-Nr.:           |           |                                    |                                 |
| Kennzahl                   | Dimension | Methode                            | A19.2884                        |
|                            |           |                                    |                                 |
| Trocken-<br>rückstand      | %         | DIN EN 12880<br>Stand: 02-2001     | 54,1                            |
| Gesamt-Stickstoff          | % OS      | Methodenbuch VDLUFA                | 0,68                            |
| CAL-Extrakt                |           | Methodenbuch VDLUFA                |                                 |
| Phosphor                   | kg/t OS   | DIN EN ISO 11885<br>Stand: 09-2009 | 0,969                           |
| Kalium                     | kg/t OS   | DIN EN ISO 11885<br>Stand: 09-2009 | 1,21                            |
| CaCl <sub>2</sub> -Extrakt |           | Methodenbuch VDLUFA                |                                 |
| Ammonium-<br>Stickstoff    | kg/t OS   | E DIN ISO 14256<br>Stand: 03-2003  | 0,0021                          |
|                            |           |                                    |                                 |

OS = Originalsubstanz

  
Bianca Denecke  
Abteilungsleiterin Chemie

Die Prüfergebnisse beziehen sich ausschließlich auf das untersuchte Prüfmaterial. Sollte die Probenahme nicht durch die ÖHMI Analytik GmbH erfolgt sein, beziehen sich die Ergebnisse auf die Probe wie erhalten. Ohne schriftliche Genehmigung des Prüflaboratoriums darf der Prüfbericht nicht auszugsweise vervielfältigt oder veröffentlicht werden. Es gelten unsere Allgemeinen Geschäftsbedingungen. Mit Auftragserteilung gelten die Allgemeinen Geschäftsbedingungen als anerkannt.

**Table S1**

Calculated amounts of compost/press-cakes for each plot to meet nutritional requirements.

Region: Etzdorf (Saxony-Anhalt, Germany)

Plot's area:  $1.7 * 1.7 \text{ m}^2 = 2.89 \text{ m}^2$

| Compost kind                    | Cultivated plant         | kg/m <sup>2</sup> | kg/plot |
|---------------------------------|--------------------------|-------------------|---------|
| Control-compost                 | <i>Triticum aestivum</i> | 1.85              | 5.35    |
| <i>Senecio</i> -compost         | <i>T. aestivum</i>       | 1.47              | 4.25    |
| <i>Senecio/Lappula</i> -compost | <i>T. aestivum</i>       | 1.52              | 4.38    |
| <i>Lappula</i> -compost         | <i>T. aestivum</i>       | 1.45              | 4.19    |
| <i>L. squarrosa</i> press-cake  | <i>T. aestivum</i>       | 0.33              | 0.96    |
| Control-compost                 | <i>Hordeum vulgare</i>   | 0.93              | 2.68    |
| <i>Senecio</i> -compost         | <i>H. vulgare</i>        | 0.74              | 2.13    |
| <i>Senecio/Lappula</i> -compost | <i>H. vulgare</i>        | 0.76              | 2.19    |
| <i>Lappula</i> -compost         | <i>H. vulgare</i>        | 0.72              | 2.09    |
| <i>L. squarrosa</i> press-cake  | <i>H. vulgare</i>        | 0.17              | 0.48    |

# HPLC-ESI-MS/MS sum parameter analysis

HPLC-ESI-MS/MS sum parameter analysis was conducted using a 1200 Series HPLC (Agilent, Waldbronn, Germany) equipped with binary solvent delivery in combination with ESI-MS/MS triple quadrupole detection (3200 QTrap, Applied Biosystems MDS Sciex, Darmstadt, Germany).

The chromatographic separation was achieved using a 150 mm × 2.1 mm, 4 µm, Synergy Max-RP 80 Å column (Phenomenex, Aschaffenburg, Germany) including a pre-column cartridge of the same material. The following gradient was applied at a flow rate of 300 µL min<sup>-1</sup> (solvent A: 0.3% formic acid in water, solvent B: 0.3% formic acid in acetonitrile): 0–2 min (95% A), 2–14 min (95–40% A), 14–15 min (40–0% A), 15–18 min (0% A), 18–19 min (0–95% A), 19–30 min (re-equilibration 95% A). Injection volume was 5 µL and the temperature of the column oven was set to 40 °C. Four transitions per compound (analyte and IST) were chosen.

For the analyte retronecine-diphthalate: 452.0 → 94.0 m/z (cell entrance potential (CEP), 18.0; collision energy (CE), 50), 452.0 → 120.0 m/z (CEP, 18.0; CE, 36), 452.0 → 149.0 m/z (CEP, 18.0; CE, 55) and 452.0 → 304.0 m/z (CEP, 24.0; CE, 40).

For the IST [9,9-<sup>2</sup>H<sub>2</sub>]-retronecine-diphthalate: 454.0 → 96.0 m/z (CEP, 18.0; CE, 50), 454.0 → 122.0 m/z (CEP, 18.0; CE, 36), 454.0 → 149.0 m/z (CEP, 24.0; CE, 55) and 454.0 → 306.0 m/z (CEP, 24.0; CE, 40).

Data analysis and integration was achieved with Analyst 1.6.2 Software (Applied Biosystems MDS Sciex, Darmstadt, Germany). The LOD/LOQ was 0.1 µg RE kg<sup>-1</sup> and 0.3 µg RE kg<sup>-1</sup>, respectively.

Identification and validation of the analyte/internal standard signals was achieved by monitoring retention time and co-occurrence of the ion transitions m/z 452.0 → 120.0 / 452.0 → 94.0 m/z (analyte) and m/z 454.0 → 122.0 / 454.0 → 96.0 m/z (IST). As additional control, the relative intensities of the transition in comparison to the IST were considered. The peak area of the analyte was corrected by subtracting 4% of the peak area of the internal standard, reflecting the amount of non-deuterated IST in the used IST preparation. The total PA/PANO content in retronecine equivalents (RE) was calculated using equation (1), representing the sum of 1,2-unsaturated retronecine/heliotridine-type PAs in a sample. To determine the result in the form of RE the known amount of IST (Mw 297.391 g mol<sup>-1</sup>) was set in relation to the molecular weight of retronecine (Mw 155.197 g mol<sup>-1</sup>), resulting in a RE factor of 0.52.

$$(1)c \text{ [}\mu\text{g kg}^{-1}\text{] RE} = \frac{\text{amount (IST) [}\mu\text{g]} \times 0.52 \text{ (RE factor)} \times \text{corrected area (analyte } m/z \text{ 452.0} \rightarrow \text{120.0)}}{\text{area (IST } m/z \text{ 454.0} \rightarrow \text{122.0)} \times \text{amount (liqueur/sample) [g/mL]}}$$

To convert sum parameter results (retronecine equivalents (RE)) into total PA-content the following approximation approach was conducted, e.g. if the major PA constituent was for example Lycopsamin-N-oxide (Mw = 315.36 g mol<sup>-1</sup>) we applied a conversion factor of 2.032 to convert RE (Mw of retronecine = 155.197 g mol<sup>-1</sup>) into a total amount of PA/PANOs in this sample.

**Table S2** The detailed analysis results of extraction and profiling of the PAs of plant samples as Chemisch-physikalische Analyse (#45183) comprising 31 individual PAs and PANOs by QSI ( Bremen, Germany).

| sample name                   | details                  | sample kind | PA-Gehalt<br>[µg/kg] | Lyc%  | LycNOx% | Int%  | IntNOx% |
|-------------------------------|--------------------------|-------------|----------------------|-------|---------|-------|---------|
| <i>Convolvulus arvensis</i>   |                          | shoot       | 4253.9               | 48.26 | 21.32   | 23.57 | 6.85    |
| <i>Echinochloa crus-galli</i> | plant (2)                | shoot       | 2944.2               | 64.56 | 6.23    | 27.67 | 1.54    |
| <i>Atriplex patula</i>        |                          | shoot       | 2386.6               | 67.57 | 0       | 32.43 | 0       |
| <i>Viola arvensis</i>         |                          | shoot       | 7254.7               | 50.83 | 13.9    | 31.33 | 3.94    |
| <i>L. multiflorum</i>         | 50cm with vessel         | shoot       | 38.1                 | 70.18 | 2.12    | 27.7  | 0       |
| <i>L. multiflorum</i>         | 50cm without vessel      | shoot       | 335.1                | 72.09 | 0       | 27.91 | 0       |
| <i>L. multiflorum</i>         | 200cm with vessel        | shoot       | 8.6                  | 66.03 | 12.74   | 21.23 | 0       |
| <i>L. multiflorum</i>         | 200cm without vessel     | shoot       | 21.4                 | 65.93 | 13.92   | 20.15 | 0       |
| <i>L. multiflorum</i>         | 400cm without vessel     | shoot       | 8.3                  | 77.78 | 0       | 22.22 | 0       |
| <i>T. aestivum</i>            | sowing stage (2020)      | soil        | 17.4                 | 0     | 100     | 0     | 0       |
| <i>H. vulgare</i>             | DC32                     | root        | 7.3                  | 69.96 | 0       | 30.04 | 0       |
| <i>H. vulgare</i>             | DC33                     | shoot       | 38.7                 | 72.88 | 5.93    | 21.19 | 0       |
| <i>Coriandrum sativum</i>     | sowing stage             | soil        | 714.4                | 0     | 61.84   | 0     | 38.16   |
| <i>Pisum sativum</i>          | sowing stage             | soil        | 111                  | 5.92  | 85.71   | 2.86  | 5.51    |
| <i>Brassica napus</i>         | sowing stage             | soil        | 332.7                | 0     | 63.22   | 0     | 36.78   |
| <i>H. vulgare</i>             | DC32                     | root        | 32.6                 | 73.08 | 9.82    | 16.75 | 0.35    |
| <i>H. vulgare</i>             | harvesting time          | soil        | 25.9                 | 0     | 92.88   | 0     | 7.12    |
| <i>H. vulgare</i>             | harvesting time          | root        | 44.8                 | 54.13 | 3.13    | 42.74 | 0       |
| <i>T. aestivum</i>            | harvesting time, Plant 1 | root        | 70.6                 | 92.31 | 0       | 7.69  | 0       |
| <i>H. vulgare</i>             | harvesting time, Plant 2 | root        | 397.7                | 66.18 | 0       | 33.82 | 0       |
| <i>T. aestivum</i>            | harvesting time, Plant 3 | straw       | 66.1                 | 53.2  | 17.25   | 28.76 | 0.79    |
| <i>H. vulgare</i>             | harvesting time, Plant 4 | straw       | 41.8                 | 59.86 | 4.93    | 35.21 | 0       |



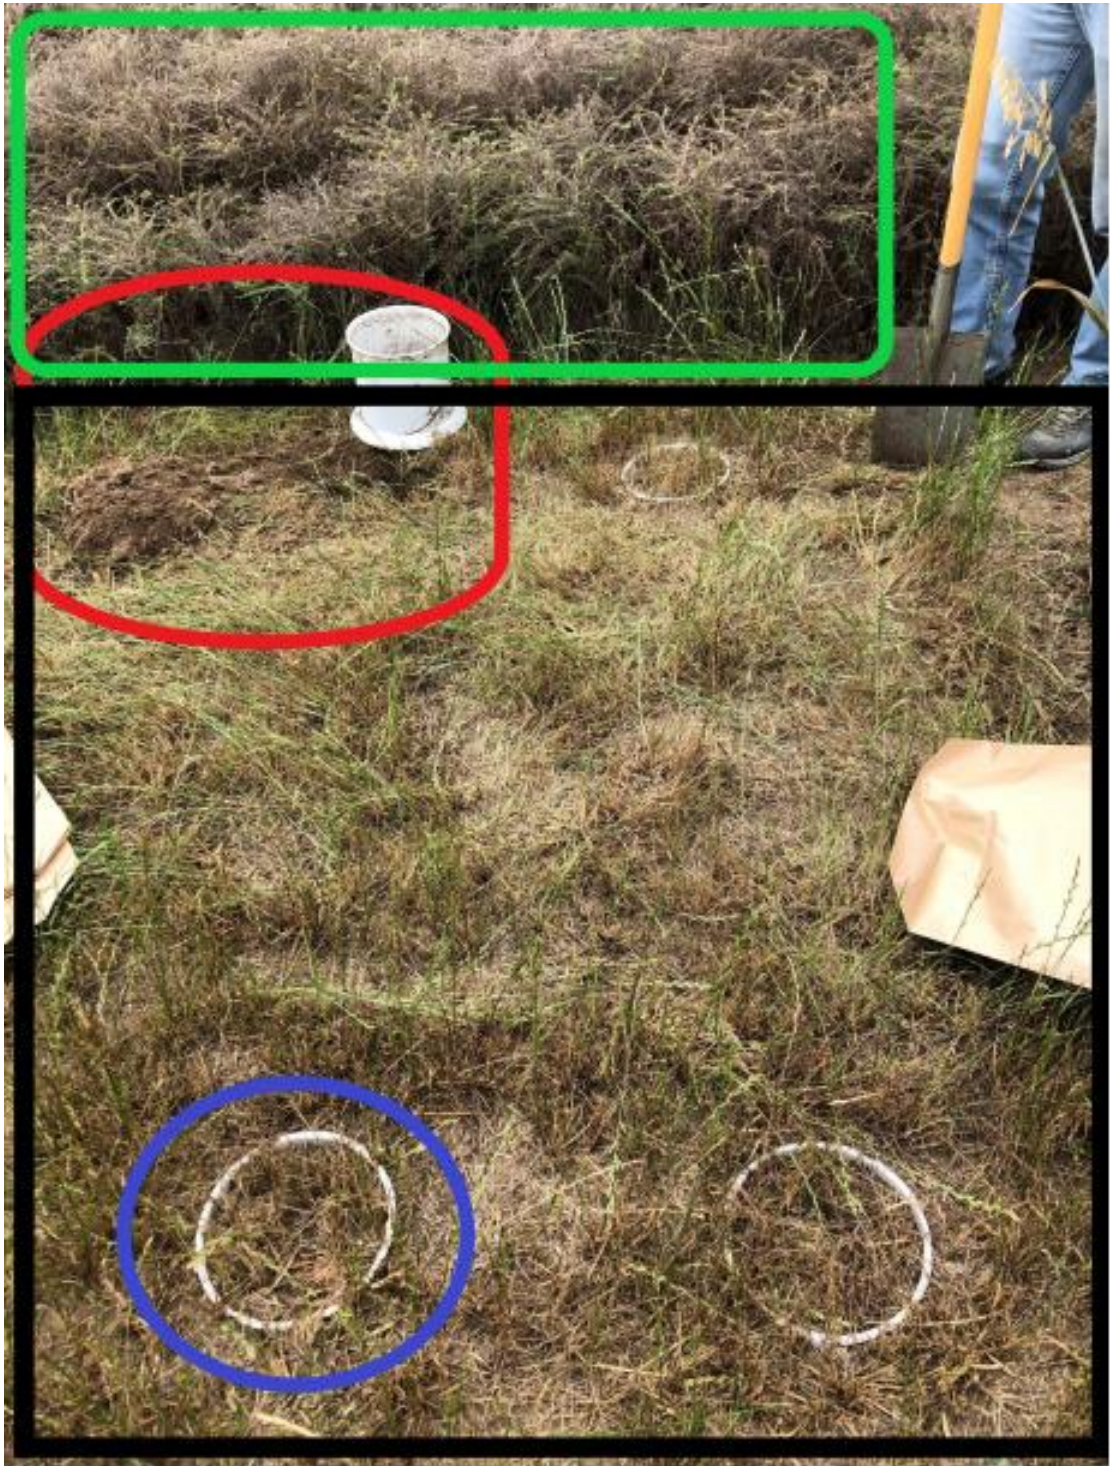

**Figure S2.** Picture to illustrate investigations of distance-related effects on PA-transfer. **Green:** *L. squarrosa* field; **Red:** Excavated Kick-Brauckmann vessel (50 cm) next to its hole; **Black:** field strip of *L. multiflorum*; **Blue:** Still buried Kick-Brauckmann vessel (200 cm) including *L. multiflorum*
